# Supplementary material for: Biotransformation of guttiferones, Symphonia globulifera metabolites, by Bipolaris cactivora, an endophytic fungus isolated from its leaves
Source: Royal Society of Chemistry journal article supplement (doi:10.1039/d0ob02443k), 2021-01-01

**Biotransformation of guttiferones, *Symphonia globulifera* metabolites, by *Bipolaris cactivora*, an endophytic fungus isolated from its leaves**

Pauline Menelle, †‡ Jérôme Quintin, †‡§ Kevin Cottet, †‡ Yann Fromentin, †‡ Joëlle Dupont, ¥  
Marie-Christine Lallemand† and Didier Buisson‡\*

† Unité PNAS UMR/CNRS CiTCoM N°8038, Faculté de Pharmacie de Paris, Université de Paris, 4 avenue de l'observatoire, 75006 Paris, France

‡ Unité Molécules de Communication et Adaptation des Microorganismes (MCAM), Muséum national d'Histoire naturelle, CNRS, CP54, 57 rue Cuvier, 75005 Paris, France

§ Centre d'Etudes et de Recherche sur le Médicament de Normandie, Normandie Université, UNICAEN, CERMN, 14000 Caen, France

¥ Institut Systématique Evolution Biodiversité (ISYEB), Muséum national d'Histoire naturelle, CNRS, Sorbonne Université, EPHE, 57 rue Cuvier, CP39, 75005 Paris, France.

**Corresponding author**

E mail [didier.buisson@mnhn.fr](mailto:didier.buisson@mnhn.fr)

Tel +33(0)140798124

## Supporting information contents

**Figure S1:** HRMS in positive mode of 3,16-oxy-guttiferone C 7

**Figure S2:** HRMS in negative mode of 1,16-oxy-guttiferone C 8

**Table S1:** NMR Spectroscopic Data ( $^1\text{H}$ , 400 MHz) and ( $^{13}\text{C}$  100 MHz) in  $\text{CD}_3\text{OD}$  for oxyguttiferone C 7 and 8

**Figure S3:**  $^1\text{H}$  NMR spectrum (400MHz,  $\text{CD}_3\text{OD}$ ) of guttiferone C 6

**Figure S4:**  $^1\text{H}$  NMR spectrum (400MHz,  $\text{CD}_3\text{OD}$ ) of 3,16-oxyguttiferone C 7

**Figure S5:**  $^{13}\text{C}$  NMR spectrum (100MHz,  $\text{CD}_3\text{OD}$ ) of 3,16-oxyguttiferone C 7

**Figure S6:** HSQC spectrum of 3,16-oxyguttiferone C 7 ( $\text{CD}_3\text{OD}$ )

**Figure S7:** HMBC spectrum of 3,16-oxyguttiferone C 7 ( $\text{CD}_3\text{OD}$ )

**Figure S8:**  $^1\text{H}$  NMR spectrum (400MHz,  $\text{CD}_3\text{OD}$ ) of 1,16-oxyguttiferone C 8

**Figure S9:**  $^{13}\text{C}$  NMR spectrum (100MHz,  $\text{CD}_3\text{OD}$ ) of 1,16-oxyguttiferone C 8

**Figure S10:** HSQC spectrum of 1,16-oxyguttiferone C 8 ( $\text{CD}_3\text{OD}$ )

**Figure S11:** HMBC spectrum of 1,16-oxyguttiferone C 8 ( $\text{CD}_3\text{OD}$ )

**Figure S12:** HPLC/UV chromatograms of *Bipolaris cactivora* biotransformations after three days incubation time. A: guttiferone A in bioreactor, B: guttiferone C in bioreactor and C: mixture of guttiferone A and C in flask.

**Figure S1:** HRMS in positive mode of 3,16-oxy-guttiferone C 7

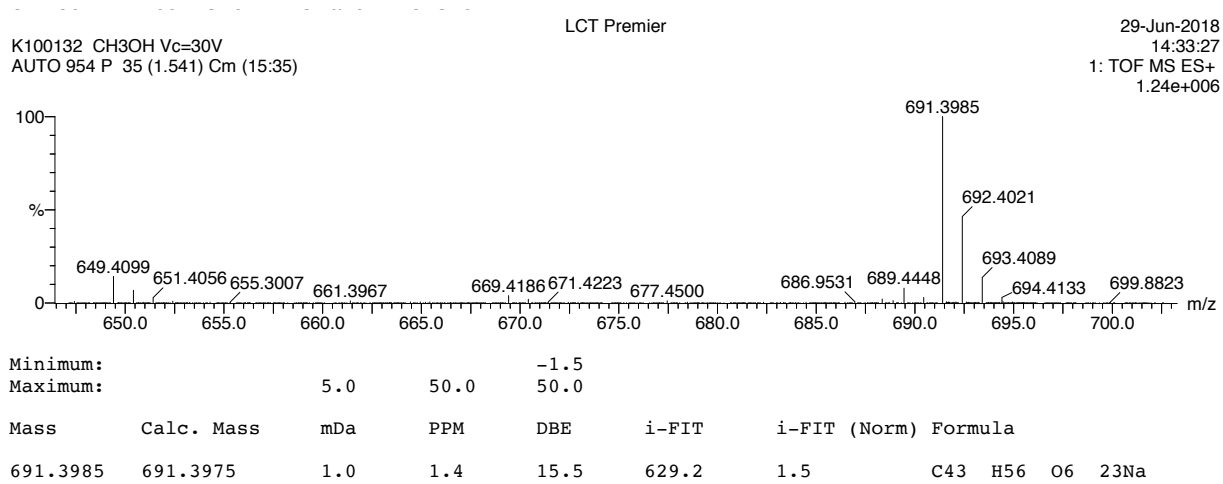

**Figure S2:** HRMS in negative mode of 1,16-oxy-guttiferone C 8

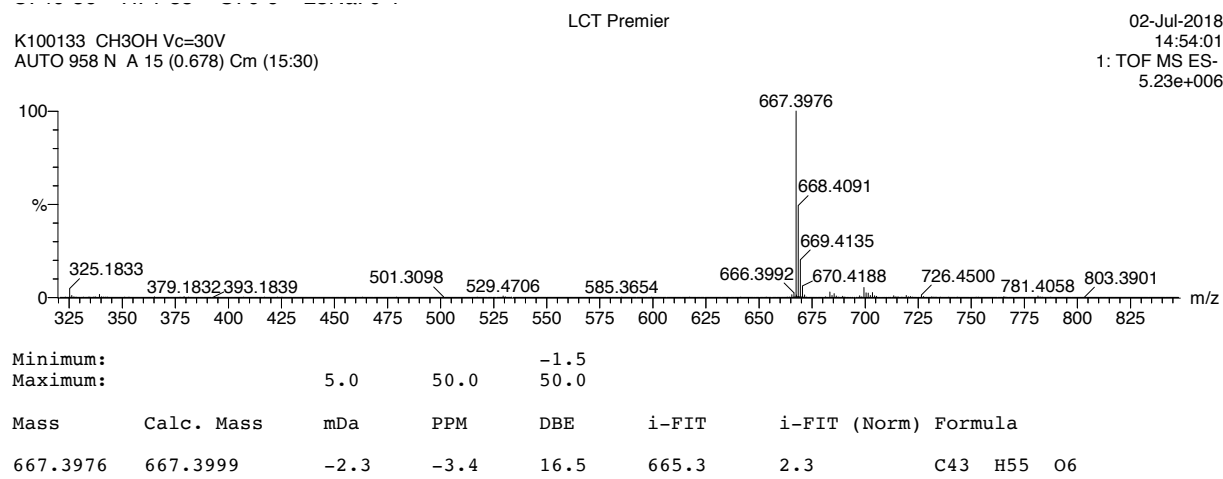

**Table S1.** NMR Spectroscopic Data (<sup>1</sup>H, 400 MHz) and (<sup>13</sup>C 100 MHz) in CD<sub>3</sub>OD for oxyguttiterone C 7 and 8

| position | 3,16 oxyguttiferone C 7 |                  |                        | 1,16 oxyguttiferone C 8 |                                |                                  |
|----------|-------------------------|------------------|------------------------|-------------------------|--------------------------------|----------------------------------|
|          | dc, type                | dH (J in Hz)     | HMBC                   | dc, type                | dH (J in Hz)                   | HMBC                             |
| 1        | 194.5, Cq               |                  |                        | 178.9, Cq               |                                |                                  |
| 2        | 121.3, Cq               |                  |                        | 121.0, Cq               |                                |                                  |
| 3        | 176.7, Cq               |                  |                        | 194.9, Cq               |                                |                                  |
| 4        | 63.3, Cq                |                  |                        | 73.6, Cq                |                                |                                  |
| 5        | 51.5, Cq                |                  |                        | 53.7, Cq                |                                |                                  |
| 6        | 53.4, Cq                |                  |                        | 57.0, Cq                |                                |                                  |
| 7        | 44.8, CH <sub>2</sub>   | 2.18 m           | 1, 6, 8, 9, 24         | 42.4, CH <sub>2</sub>   | 2.44 d (14)<br>2.05 dd (14, 7) | 1, 5, 6, 8, 9, 24<br>1, 6, 8, 24 |
| 8        | 41.0, CH                | 1.89 m           | 5, 7, 24               | 40.3, CH                | 1.87 m                         | 7                                |
| 9        | 208.7, Cq               |                  |                        | 208.4, Cq               |                                |                                  |
| 10       | 173.7, Cq               |                  |                        | 174.1, Cq               |                                |                                  |
| 11       | 118.2, Cq               |                  |                        | 118.8, Cq               |                                |                                  |
| 12       | 109.6, CH               | 7.44 s           | 10, 13, 14, 16         | 109.6, CH               | 7.44 s                         | 10, 13, 14, 16                   |
| 13       | 146.9, Cq               |                  |                        | 146.5, Cq               |                                |                                  |
| 14       | 151.3, Cq               |                  |                        | 151.0, Cq               |                                |                                  |
| 15       | 103.9, CH               | 6.94 s           | 11, 13, 14, 16         | 104.1, CH               | 6.91 s                         | 11, 13, 14, 16                   |
| 16       | 154.7, Cq               |                  |                        | 154.6, Cq               |                                |                                  |
| 17       | 26.5, CH <sub>2</sub>   | 2.89 m           | 3, 4, 9, 18, 19        | 26.5, CH <sub>2</sub>   | 2.65 t (8)                     | 3, 4, 9, 18, 19                  |
| 18       | 120.3, CH               | 4.67 m           | 20 and 21              | 119.9, CH               | 4.76 m                         | 20 and 21                        |
| 19       | 135.9, Cq               |                  |                        | 135.4, Cq               |                                |                                  |
| 20       | 26.1, CH <sub>3</sub>   | 1.43 s           | 18, 19, 21             | 26.2, CH <sub>3</sub>   | 1.56 s                         | 18, 19, 21                       |
| 21       | 18.7, CH <sub>3</sub>   | 1.77 s           | 18, 19, 20             | 18.7, CH <sub>3</sub>   | 1.73 s                         | 18, 19, 20                       |
| 22       | 20.4, CH <sub>3</sub>   | 1.28 s           | 4, 5, 6, 23            | 20.4, CH <sub>3</sub>   | 1.14 s                         | 4, 5, 6, 23                      |
| 23       | 36.5, CH <sub>3</sub>   | 1.89 m           | 5, 6, 40               | 36.2, CH <sub>2</sub>   | 1.39 m                         | 39                               |
| 24       | 30.3, CH <sub>2</sub>   | 1.89 m           | 5, 6, 7                | 30.4, CH <sub>2</sub>   | 1.87 m                         | 7                                |
| 25       | 125.3, CH               | 4.82 m           | 27 and 28              | 125.1, CH <sub>2</sub>  | 4.76 m                         | 27 and 28                        |
| 26       | 133.7, Cq               |                  |                        | 133.8, Cq               |                                |                                  |
| 27       | 26.0, CH <sub>3</sub>   | 1.60 s           | 25, 26, 28             | 25.9, CH <sub>3</sub>   | 1.51 s                         | 25, 26, 28                       |
| 28       | 18.0, CH <sub>3</sub>   | 1.33 s           | 25, 26, 27             | 18.5, CH <sub>3</sub>   | 0.98 s                         | 25, 26, 27                       |
| 29       | 38.8, CH <sub>2</sub>   | 2.18 m           | 1, 7, 8, 9, 30, 31, 34 | 37.7, CH <sub>2</sub>   | 2.30 m                         | 8, 9, 30                         |
| 30       | 44.1, CH                | 2.67 h (5)       | 29, 31, 32, 33, 34     | 44.7, CH                | 1.87 m<br>2.30 m               | 1, 7, 8, 30, 31, 34              |
| 31       | 150.2, Cq               |                  |                        | 148.1, Cq               |                                |                                  |
| 32       | 114.7, CH <sub>2</sub>  | 4.47 s<br>4.38 m | 30 and 33<br>30 and 33 | 112.9, CH <sub>2</sub>  | 4.16 s<br>4.09 m               | 30 and 33<br>30 and 33           |
| 33       | 17.9, CH <sub>3</sub>   | 1.57 s           | 30, 31, 32             | 17.9, CH <sub>3</sub>   | 1.59 s                         | 30, 31, 32                       |
| 34       | 32.5, CH <sub>2</sub>   | 1.38 s           |                        | 32.9, CH <sub>2</sub>   | 1.63 m                         |                                  |
| 35       | 36.8, CH <sub>2</sub>   | 1.89 m           | 34, 36, 37, 38         | 36.3, CH <sub>2</sub>   | 1.87 m                         | 34, 36, 37, 38                   |
| 36       | 149.5, Cq               |                  |                        | 147.0, Cq               |                                |                                  |
| 37       | 110.4, CH <sub>2</sub>  | 4.64 m<br>4.61 s | 35 and 38<br>35 and 38 | 110.7, CH <sub>2</sub>  | 4.58 s<br>4.61 s               | 35 and 38<br>35 and 38           |
| 38       | 22.6, CH <sub>3</sub>   | 1.67 s           | 35 and 37              | 22.6, CH <sub>3</sub>   | 1.67 s                         | 35, 36, 37                       |
| 39       | 24.1, CH <sub>2</sub>   | 1.89 m           | 5, 40, 41              | 24.2, CH <sub>2</sub>   | 1.87 m                         | 40                               |
| 40       | 125.0, CH               | 5.10 t           | 42 and 43              | 124.8, CH               | 5.11 t (7)                     | 42 and 43                        |
| 41       | 133.0, Cq               |                  |                        | 132.9, Cq               |                                |                                  |
| 42       | 25.9, CH <sub>3</sub>   | 1.69 s           | 40, 41, 43             | 25.7, CH <sub>3</sub>   | 1.70 s                         | 40, 41, 43                       |
| 43       | 17.8, CH <sub>3</sub>   | 1.60 s           | 40, 41, 42             | 17.7, CH <sub>3</sub>   | 1.61 s                         | 40, 41, 42                       |



**Figure S4:**  $^1\text{H}$  NMR spectrum (400MHz,  $\text{CD}_3\text{OD}$ ) of 3,16-oxyguttiferone C 7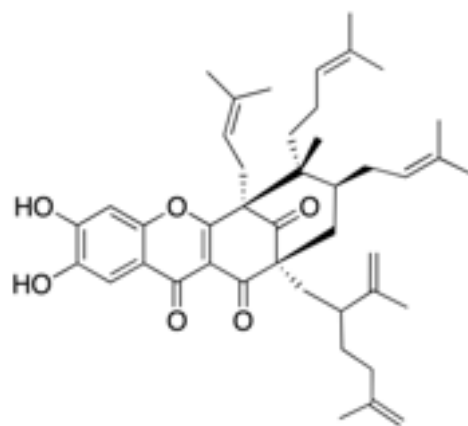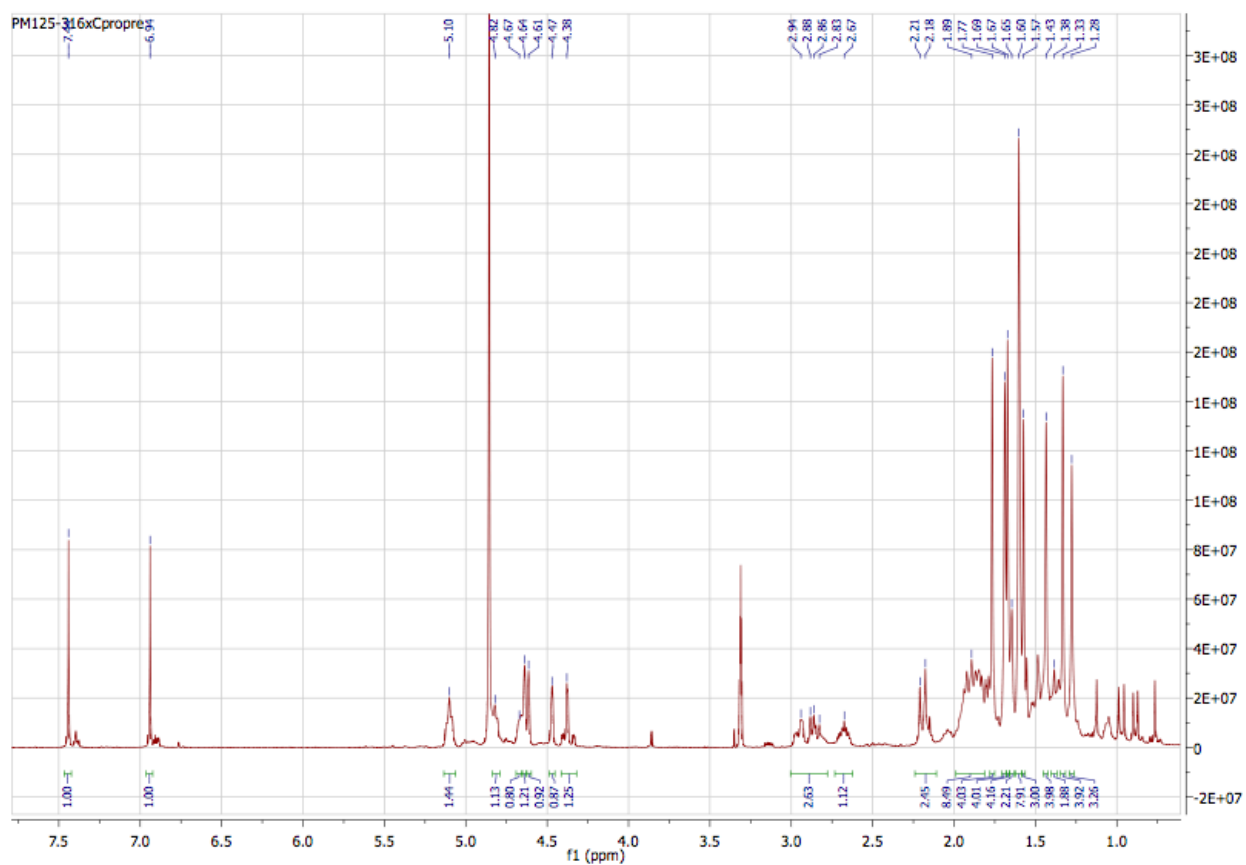

**Figure S5:**  $^{13}\text{C}$  NMR spectrum (100MHz,  $\text{CD}_3\text{OD}$ ) of 3,16-oxyguttiferone C 7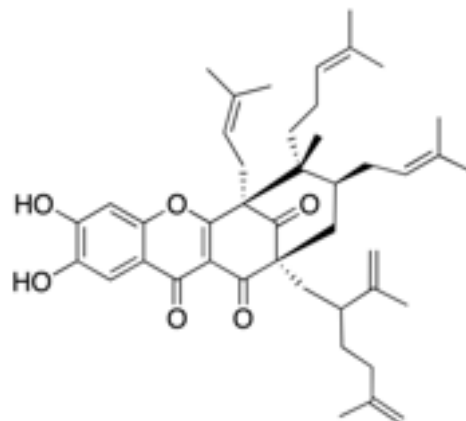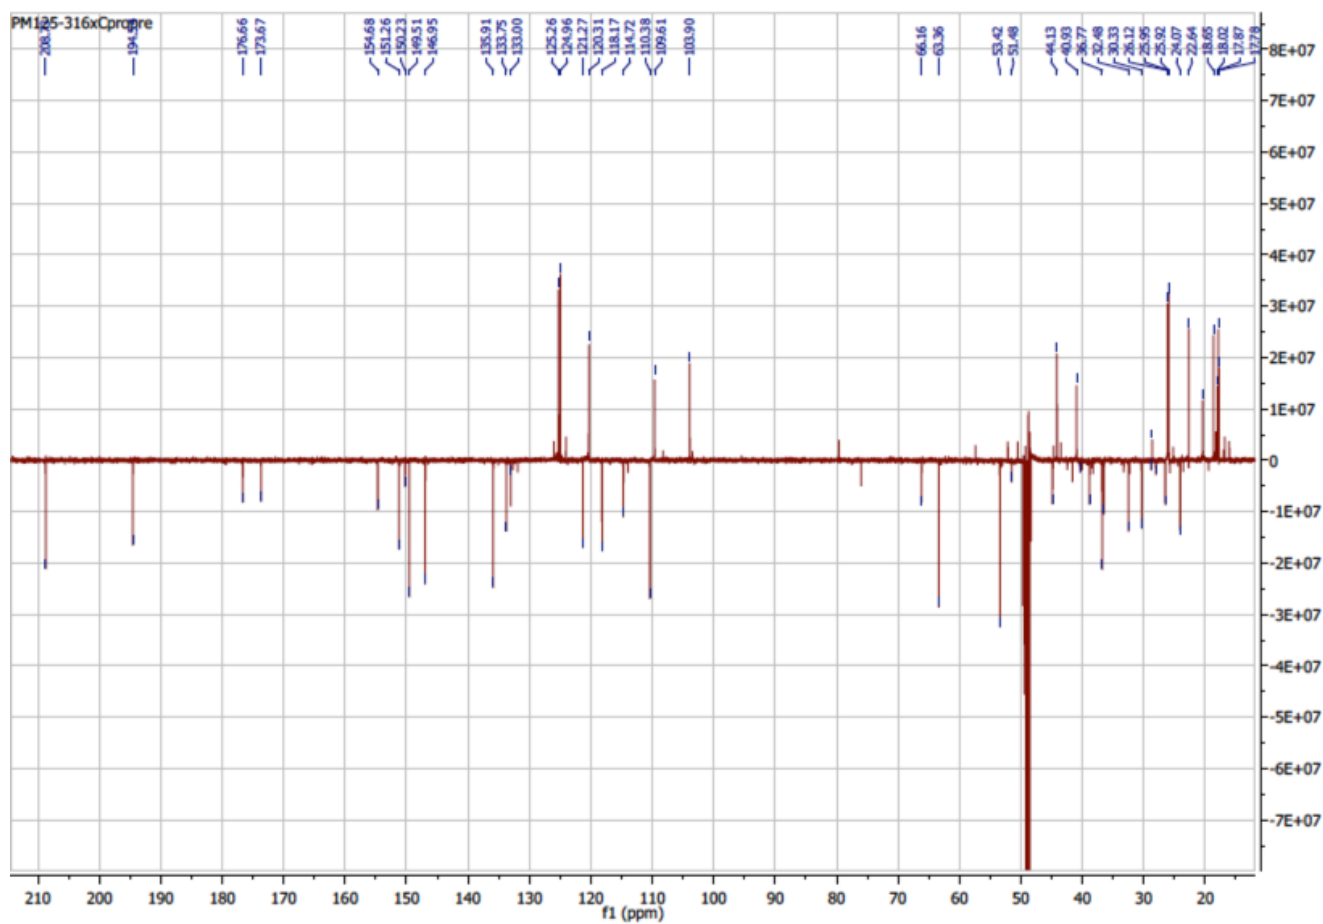



**Figure S6:** HSQC spectrum of 3,16-oxyguttiferone C 7 (CD<sub>3</sub>OD)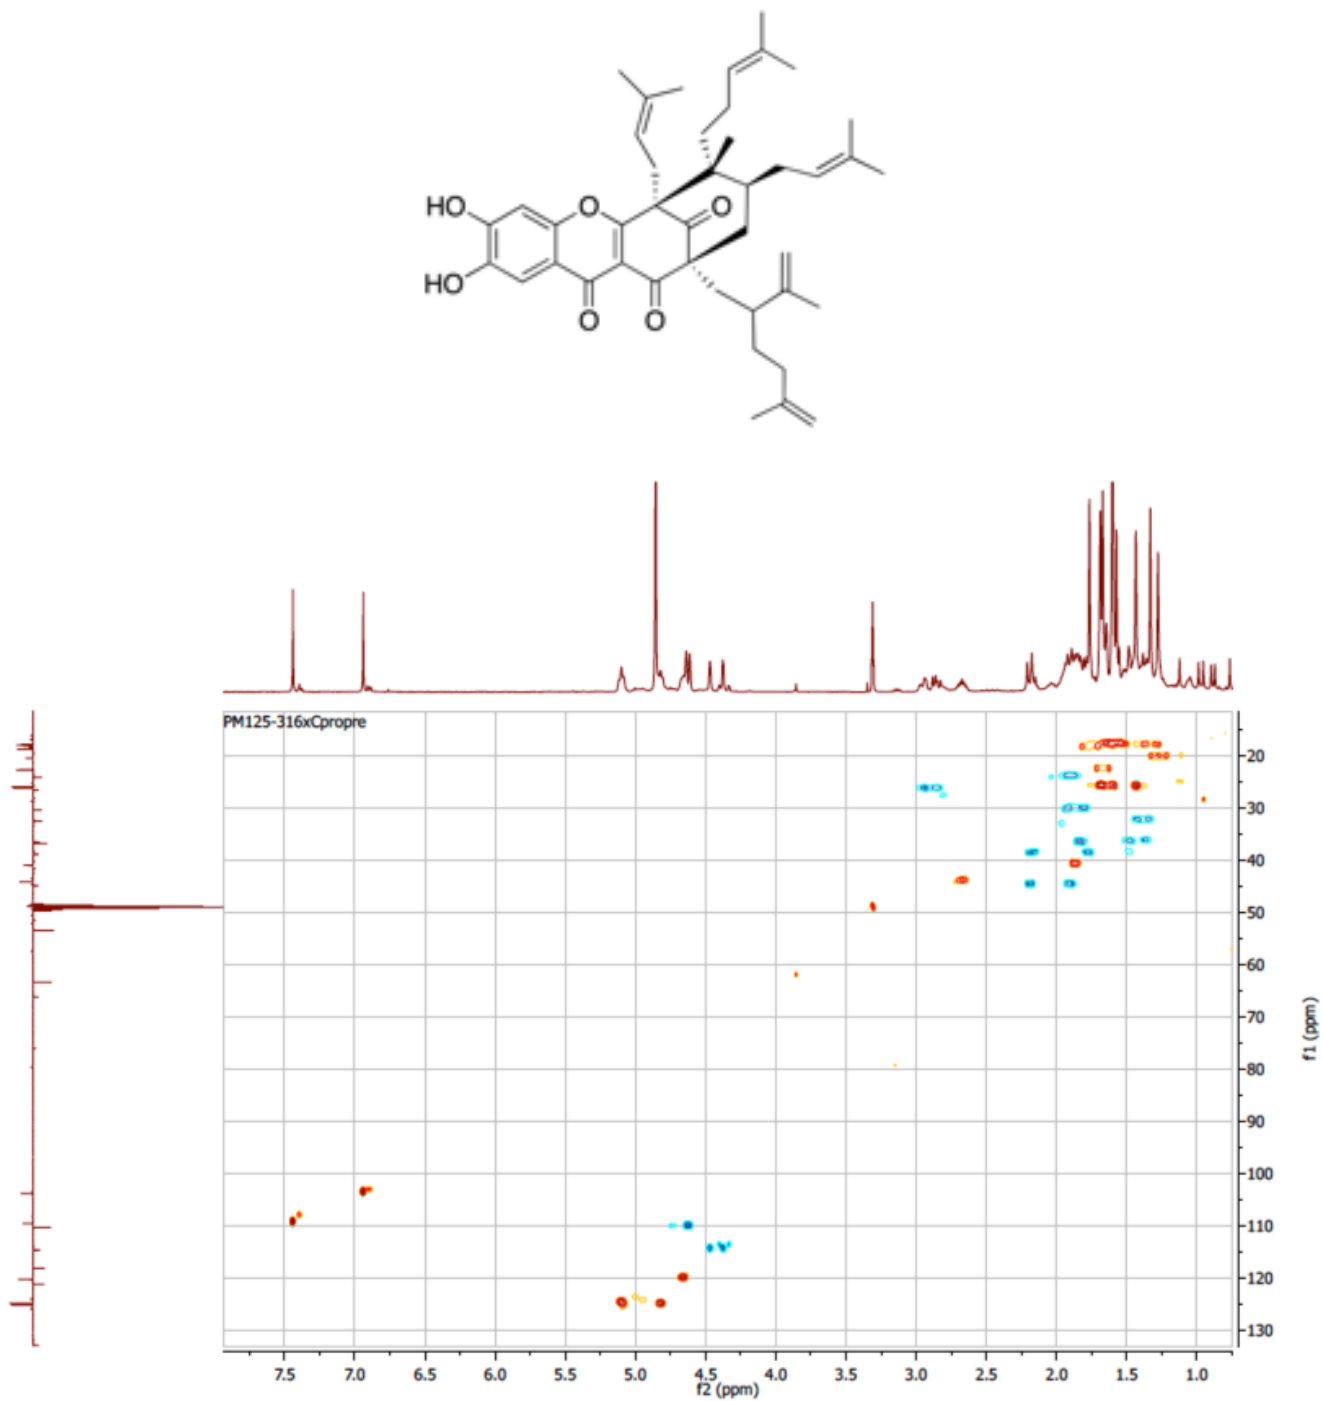

Figure S7: HMBC spectrum of 3,16-oxyguttiferone C 7 (CD<sub>3</sub>OD)

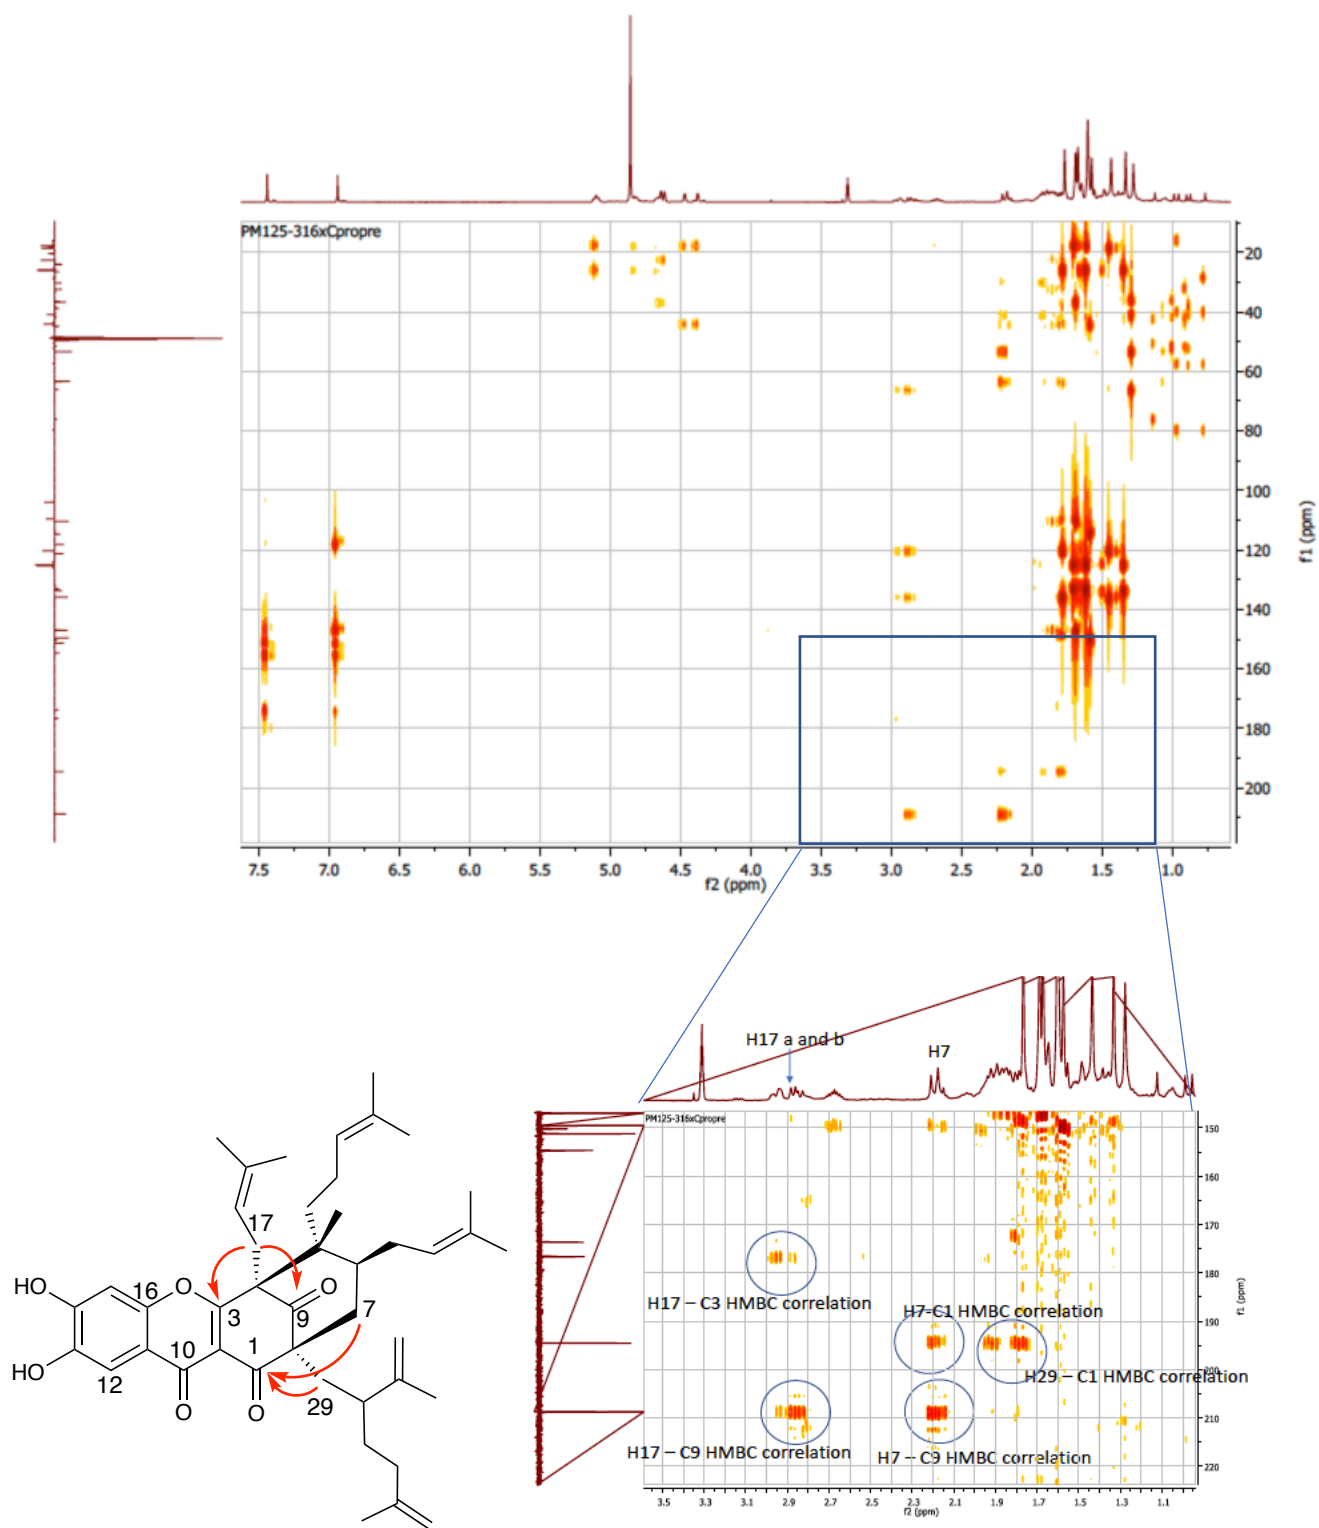

**Figure S8:**  $^1\text{H}$  NMR spectrum (400MHz,  $\text{CD}_3\text{OD}$ ) of 1,16-oxyguttiferone C 8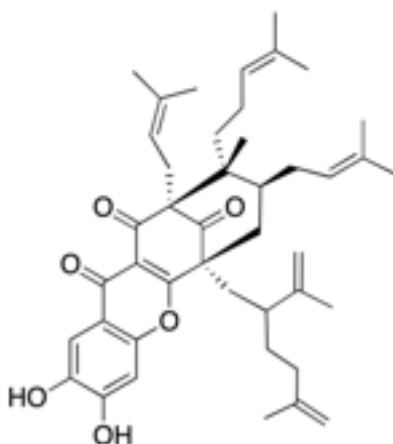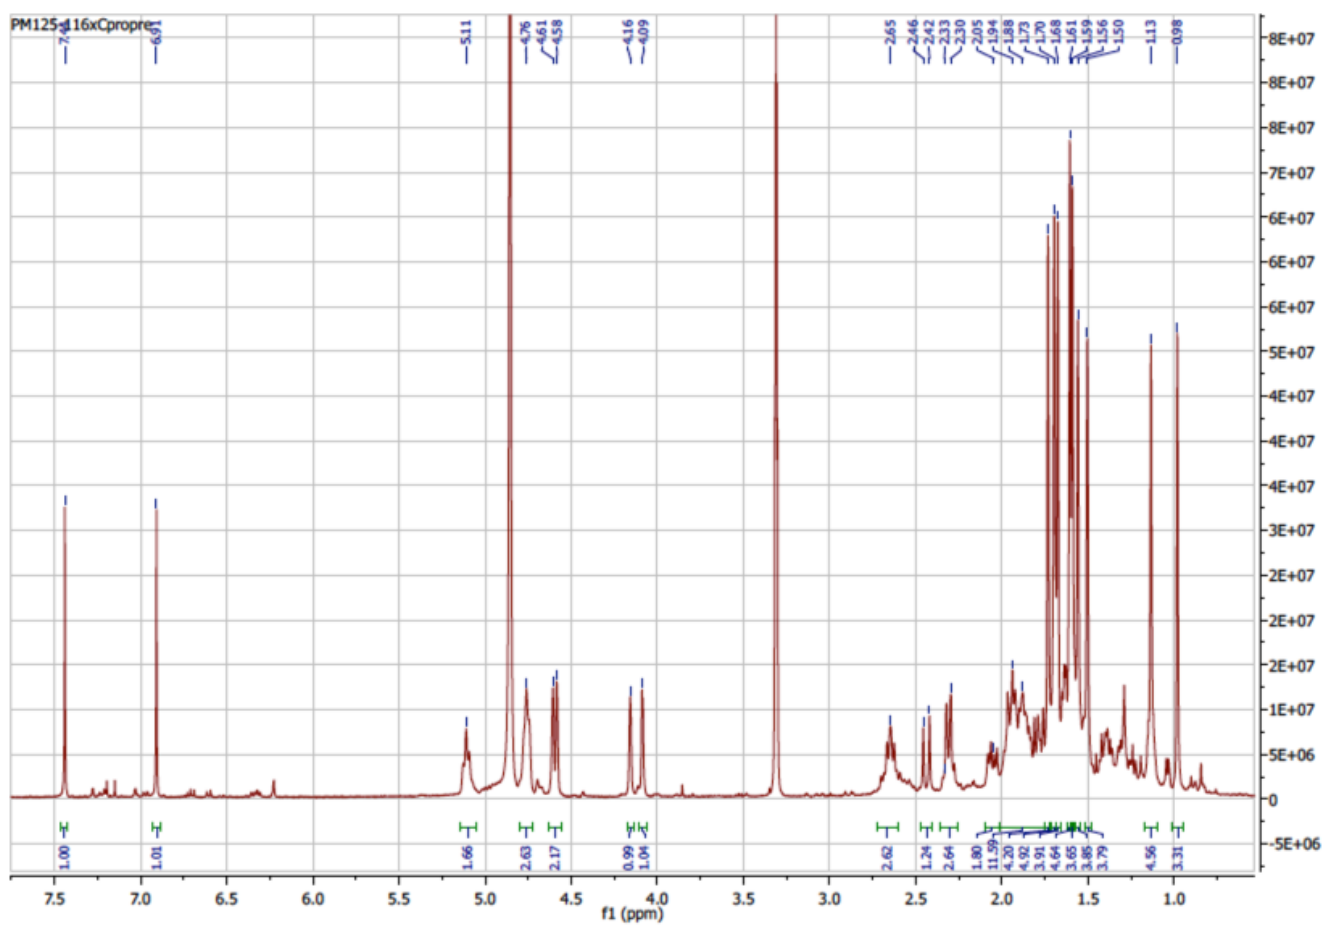

**Figure S9:**  $^{13}\text{C}$  NMR spectrum (100MHz,  $\text{CD}_3\text{OD}$ ) of 1,16-oxyguttiferone C 8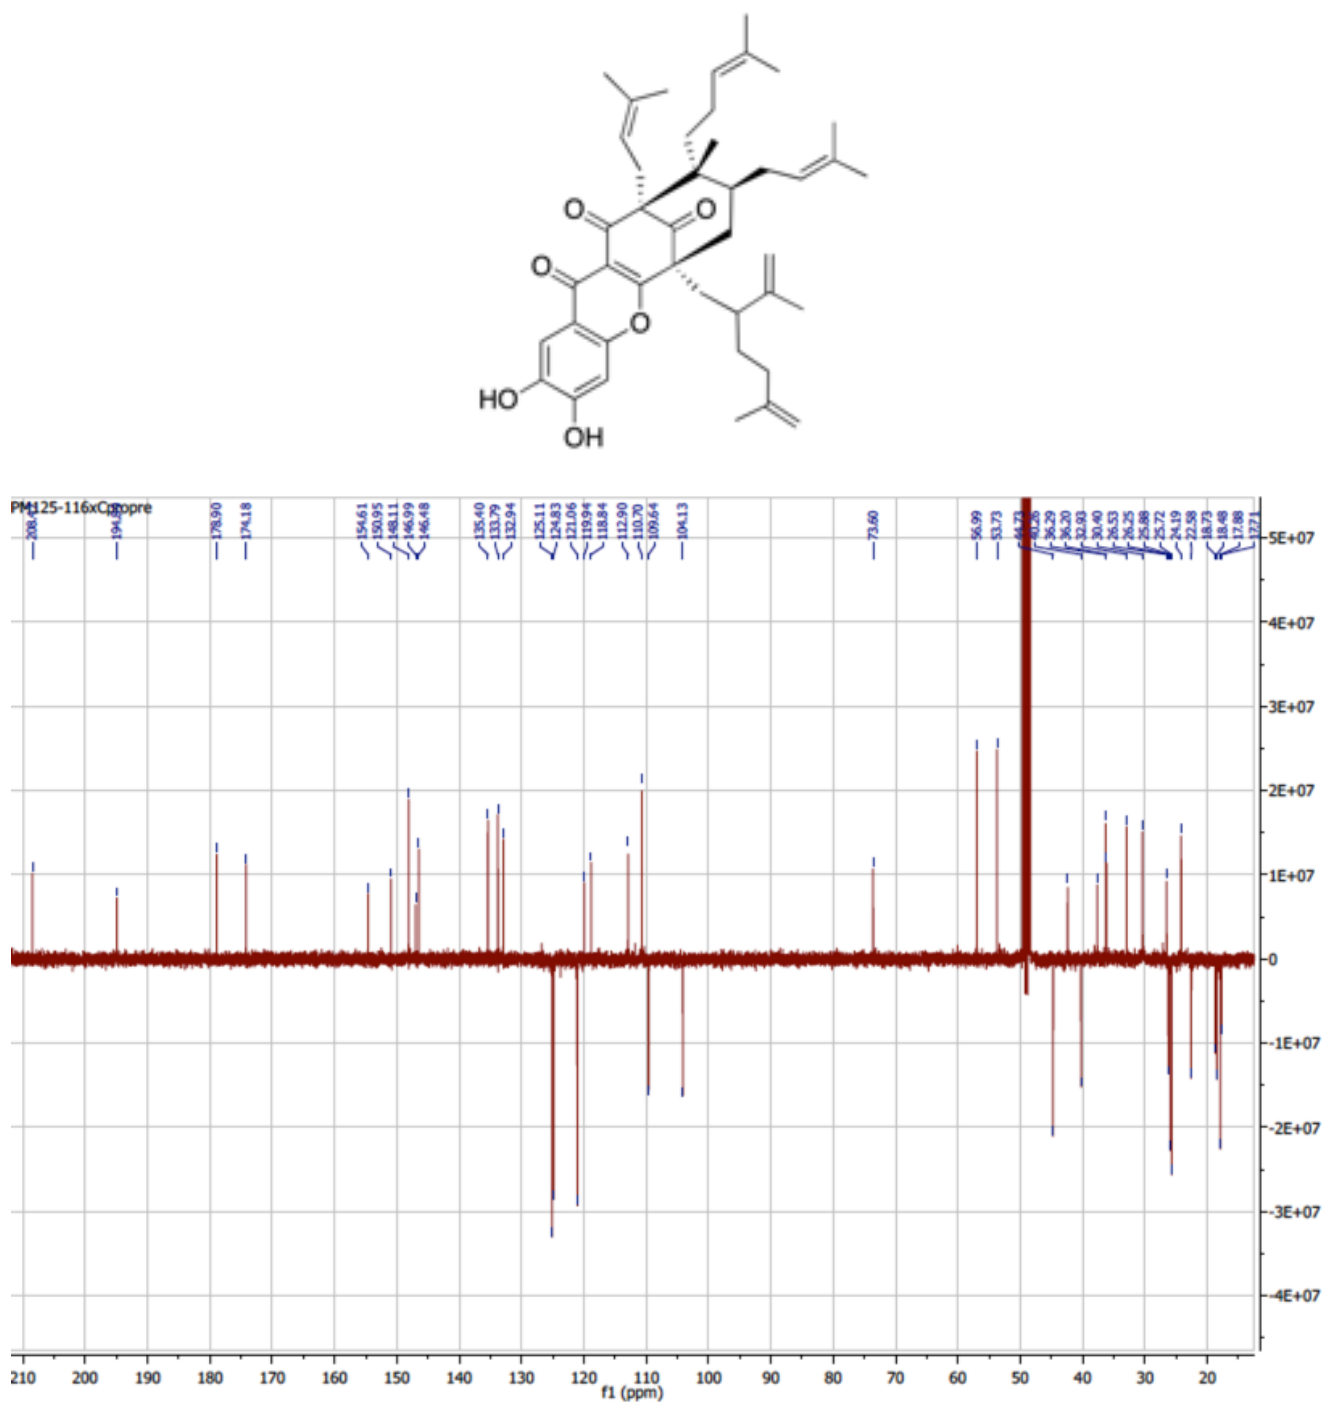

**Figure S10:** HSQC spectrum of 1,16-oxyguttiferone C **8** (CD<sub>3</sub>OD)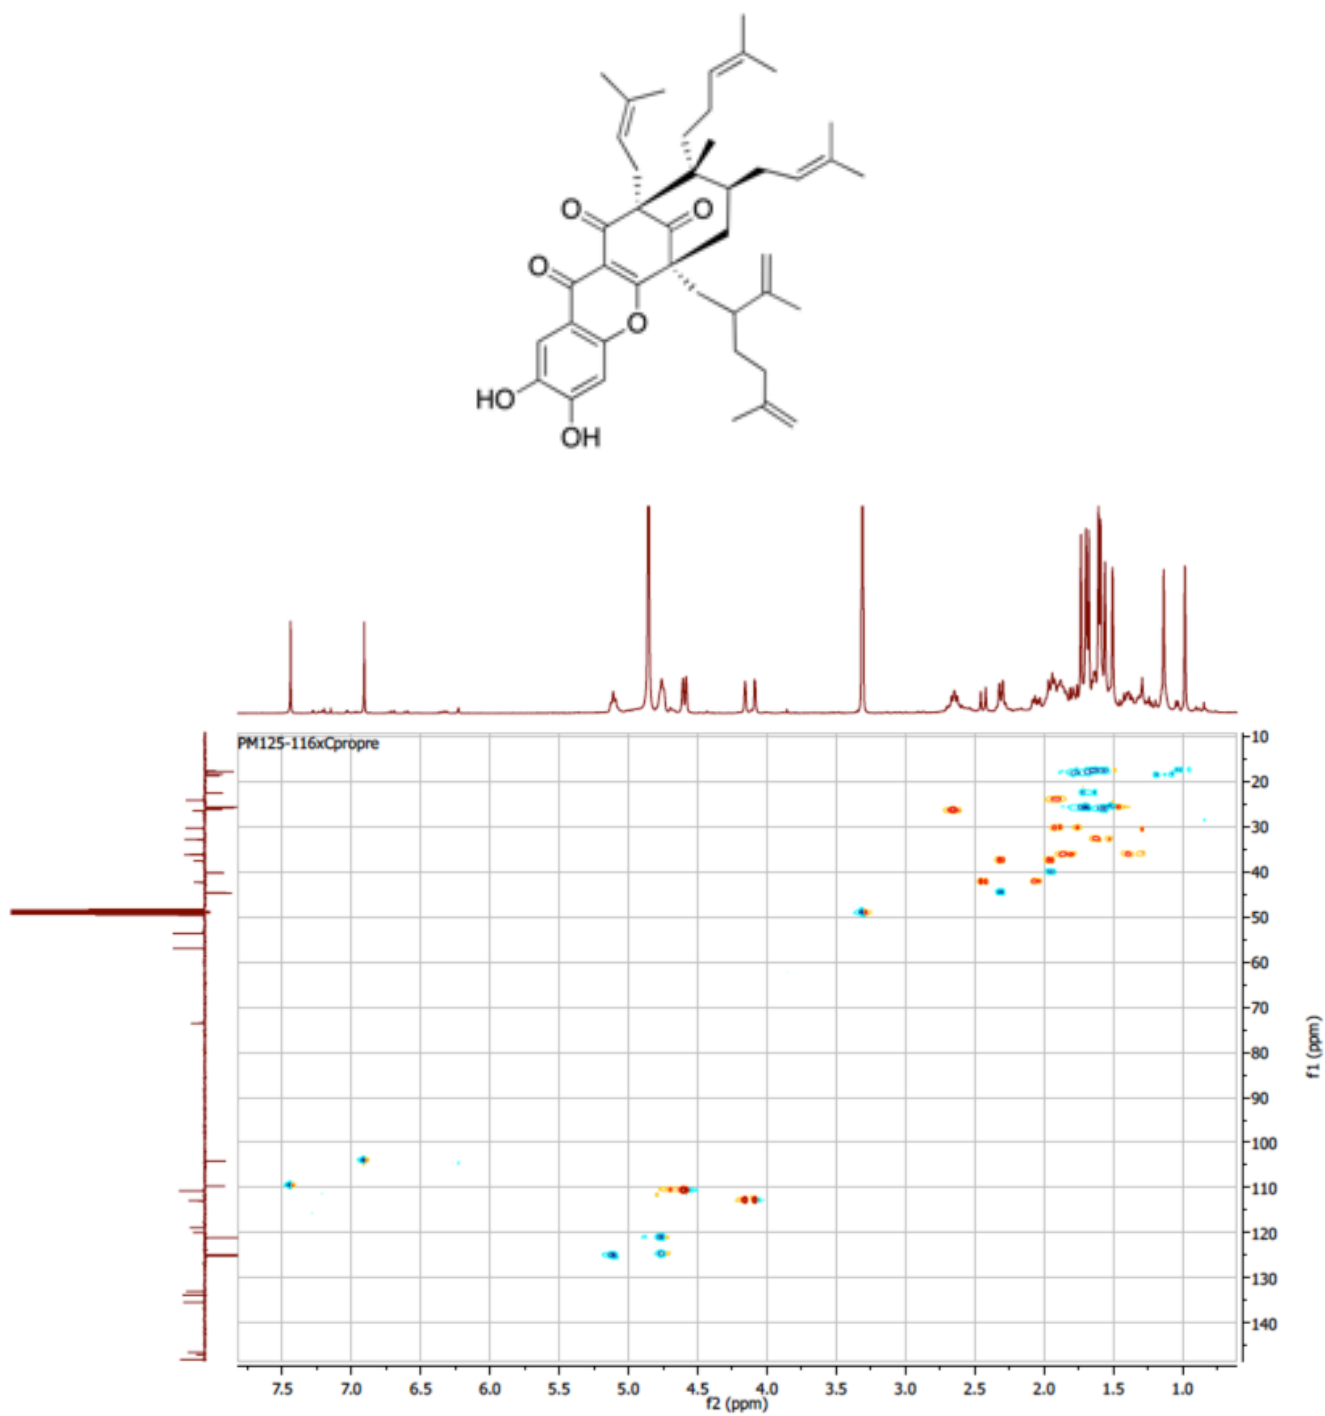

Figure S11: HMBC spectrum of 1,16-oxyguttiferone C **8** (CD<sub>3</sub>OD)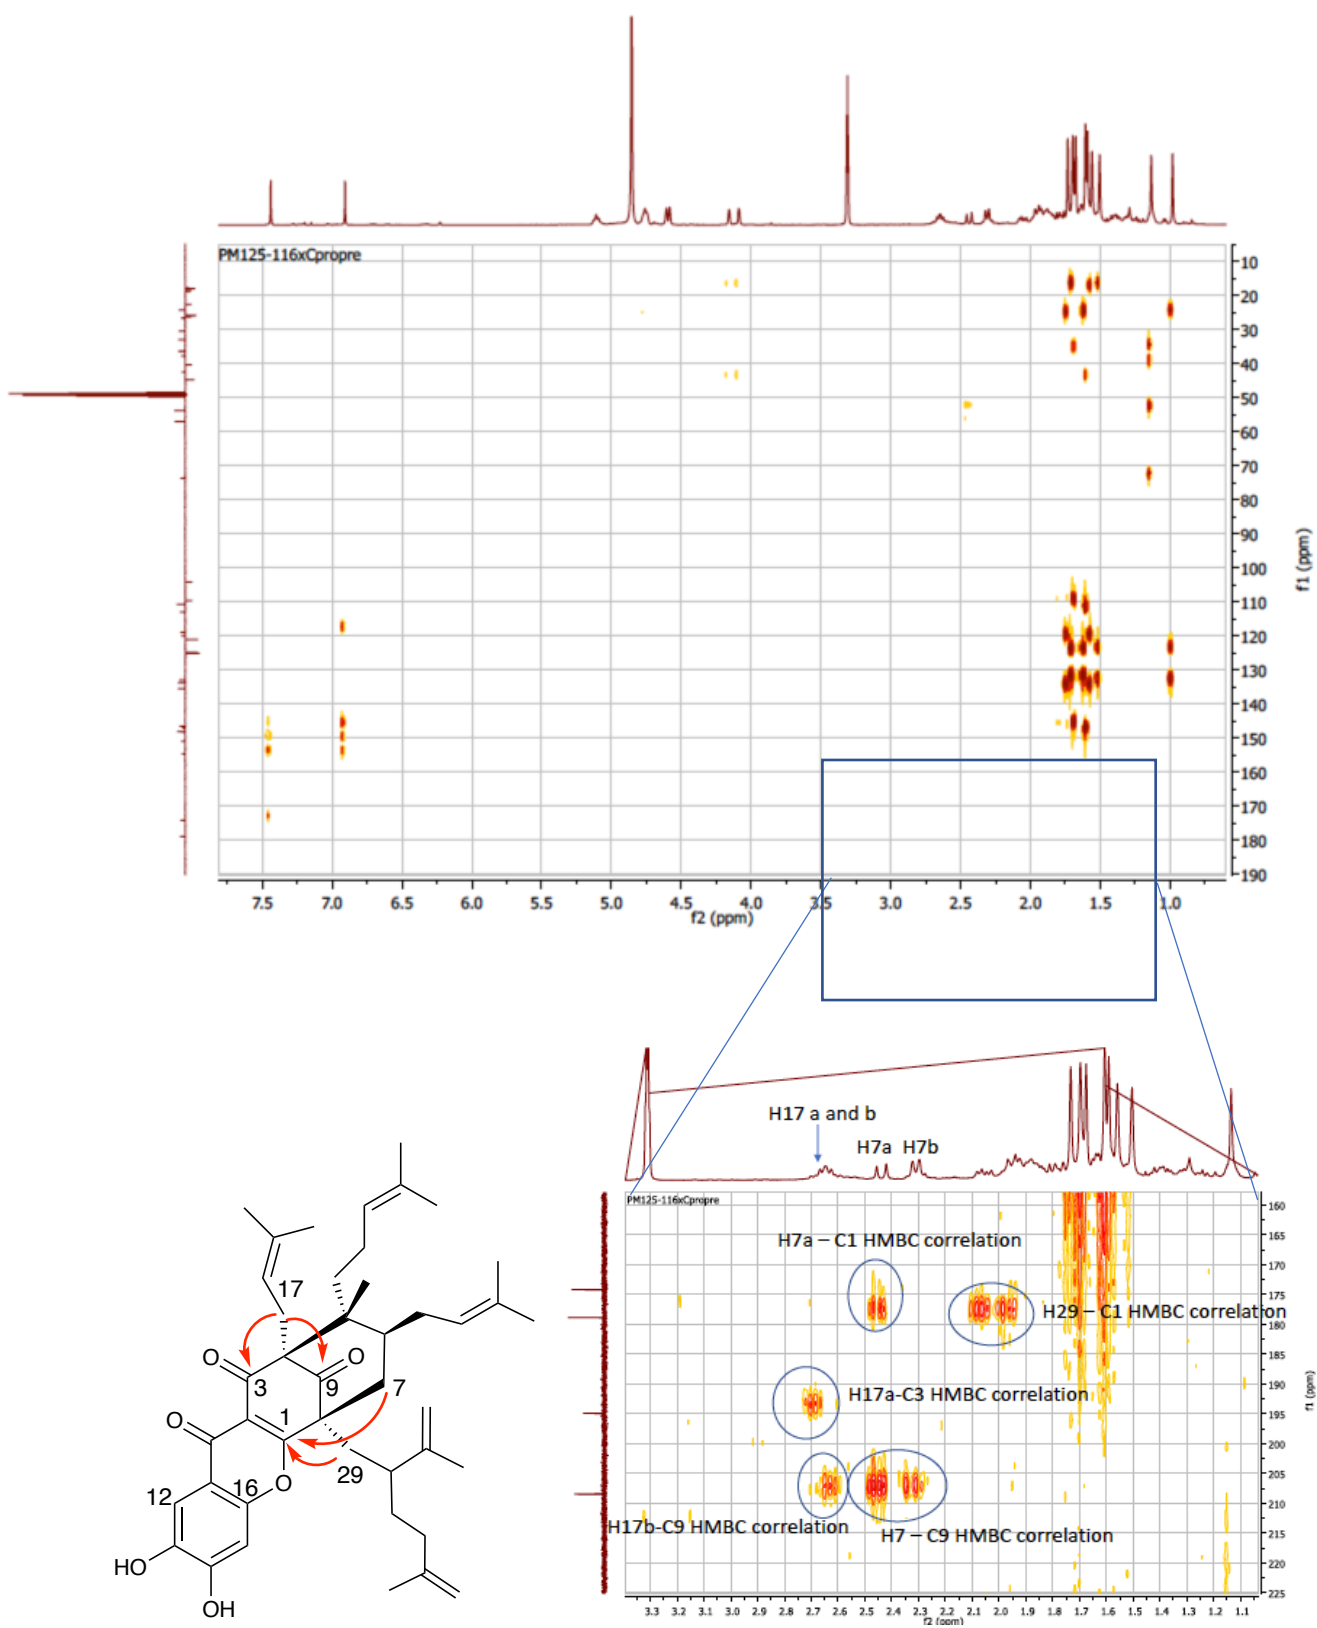

**Figure S12:** HPLC/UV chromatograms of *Bipolaris cactivora* biotransformations after three days incubation time. A: guttiferone A in bioreactor, B: guttiferone C in bioreactor and C: mixture of guttiferone A and C in flask.

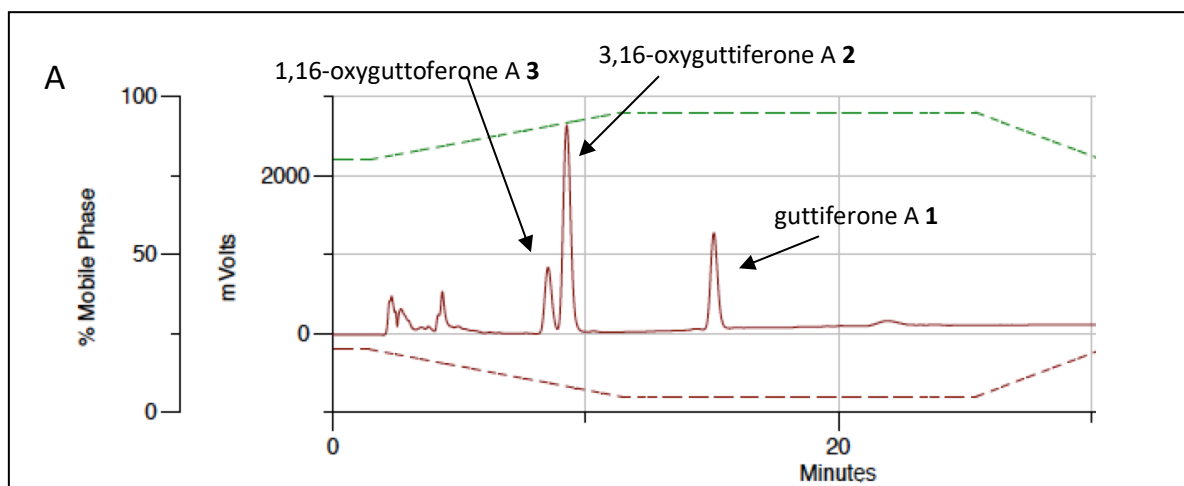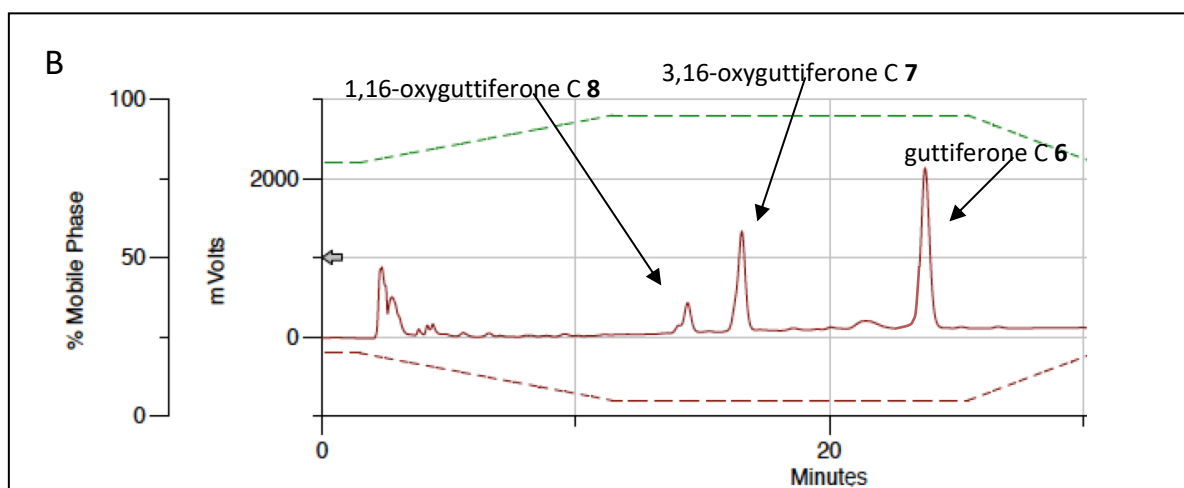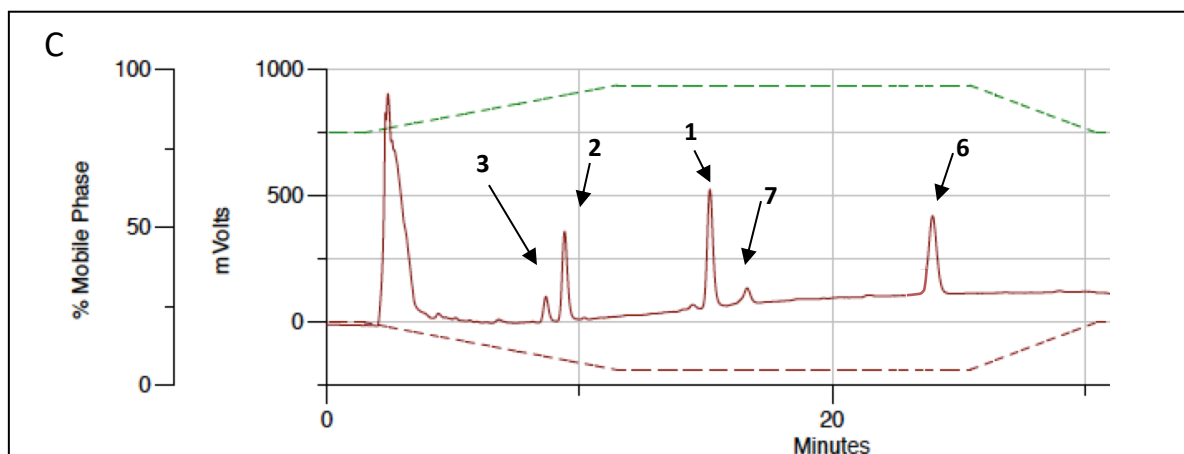

Supplement: d0ob02443k1.pdf [file d0ob02443k1.pdf]
